# Supplementary material for: Targeting senescent cells with NKG2D-CAR T cells
Source: Springer Nature journal article supplement (doi:10.1038/s41420-024-01976-7), 2024-05-04

Supplementary Figure 1

GFAP

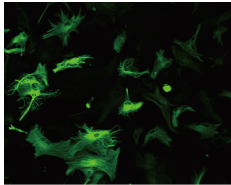

DAPI

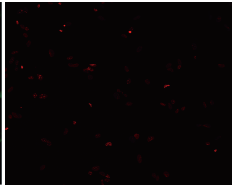

Merge

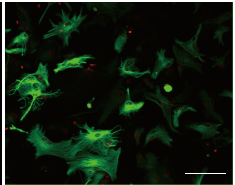

Supplement: MOESM2 [file 41420_2024_1976_MOESM2_ESM.pdf]
